# Supplementary material
Source: PubMed Central journal article supplement (PMC4519383)
Supplement: NIHMS696285-supplement.pdf [file NIHMS696285-supplement.pdf]

## Supplemental Information



**Figure S1** Expression optimization of berberine bridge enzyme (BBE). **(A)** Scoulerine production as a function of PsBBE expression method. PsBBE was expressed from either a high-copy plasmid in CSY288 or integrated into the chromosome (CSY844). **(B)** Conversion efficiency of reticuline to scoulerine as a function of PsBBE expression method. Strains are as described in A.



**Figure S2** Expression optimization of cheilanthifoline synthase (CFS). **(A)** LC-MS analysis of growth media of CSY844 with EcCFS expressed from a low-copy plasmid. Traces are shown for a no EcCFS enzyme control strain (left) and an engineered strain expressing EcCFS (right). EICs for compounds corresponding to scoulerine (328 m/z) and cheilanthifoline (326 m/z) are shown. **(B)** Fragmentation pattern of the 326 EIC peak produced from the engineered yeast strain. Major predicted fragment:  $m/z = 178$  (Schmidt and Raith, 2005). LC-MS traces and fragmentation patterns are representative of at least 3 independent experiments. **(C)** Fold improvement in cheilanthifoline production when CFS variants are expressed from a low-copy plasmid versus a high-copy plasmid in CSY844. **(D)** Confocal microscopy analysis of CFS variants C-terminally tagged with GFP on high- or low-copy plasmids coexpressed with ER marker DsRed-Kar2-

HDEL in CSY844. Scale bars are 4  $\mu\text{m}$ . Images are representative of at least 3 independent experiments.



**Figure S3** Optimization of stylopine production through culturing methods. **(A)** LC-MS analysis of growth media of CSY844 with EcCFS and EcSTS each on low copy plasmids. Traces are shown for a no EcSTS enzyme control strain (left) and an engineered strain expressing EcSTS (middle). EICs for compounds corresponding to cheilanthifoline (326 m/z) and stylopine (324 m/z) are shown. A 250 nM stylopine standard is included for comparison. Fragmentation pattern of the 324 EIC peak produced from the engineered yeast strain are shown (right). Major predicted fragments: m/z = 176, 149 (Hagel et al., 2012). LC-MS traces and fragmentation patterns are representative of at least 3 independent experiments. **(B)** Stylopine production as a function species variant and growth temperature. STS variants were expressed with EcCFS from low-copy plasmids in CSY844. **(C)** Stylopine production and growth over time in CSY904. Dashed lines represent the growth curves while solid lines represent the stylopine production curve. **(D)** Stylopine production per optical density unit as a function of culturing conditions in

CSY904. All cultures were grown at 25 °C. Standard: 1X YNB dropout media with 2% dextrose and 2 mM norlaudanosoline; Dense: 5X YNB dropout media with 2% dextrose and 2 mM norlaudanosoline; 2 stage: growth stage in 5X YNB dropout media with 2% dextrose, then production stage with 1X YNB dropout media with 2% dextrose and 2 mM norlaudanosoline; Galactose: As described in 2 stage but with 2% galactose during production phase. **(E)** Stylopine production as a function of carbon source during production stage. **(F)** Total BIA production as a function of carbon source during the production stage.



**Figure S4** *cis-N*-methylstylopine, protopine, and sanguinarine production in engineered yeast strains. **(A)** LC-MS analysis of growth media of CSY904 with PsTNMT and PsMSH. Traces are shown for a no PsTNMT enzyme control strain (left), an engineered strain expressing PsTNMT from a low-copy plasmid (middle), and an engineered strain expressing PsTNMT and PsMSH each from a low-copy plasmid (right). A protopine standard is included for comparison (right). EICs for compounds corresponding to stylopine (324 m/z), *cis-N*-methylstylopine (338 m/z), and protopine (354 m/z) are shown. **(B)** Fragmentation pattern of the 338 EIC peak produced from the engineered yeast strain shown in A, middle. Major predicted fragment: m/z = 190 (Schmidt and Raith, 2005). **(C)** Fragmentation pattern of the 354 EIC peak produced from the engineered yeast strain shown in A, right. Major predicted fragments: m/z = 189, 188, 149, 206, 275, 165 (Schmidt and Raith, 2005). LC-MS traces and fragmentation patterns are representative of at least 3 independent experiments. **(D)** *cis-N*-methylstylopine production as a function of TNMT

species variant. **(E)** Production of protopine and sanguinarine as a function of time. Blue bars indicate protopine production and purple bars indicate sanguinarine production.

**Table 1** Yeast strains used in this study.

| Strain | Genotype                                                                                                                                                                                                                                                                                                                                                                                                  | Reference                  |
|--------|-----------------------------------------------------------------------------------------------------------------------------------------------------------------------------------------------------------------------------------------------------------------------------------------------------------------------------------------------------------------------------------------------------------|----------------------------|
| CSY288 | W303<br><i>his3</i> ::P <sub>TEF1</sub> -Ps6OMT, <i>leu2</i> ::P <sub>TEF1</sub> -PsCNMT, <i>ura3</i> ::P <sub>TEF1</sub> -Ps4'OMT                                                                                                                                                                                                                                                                        | (Hawkins and Smolke, 2008) |
| CSY953 | <i>his3</i> ::P <sub>TEF1</sub> -Ps6OMT, <i>leu2</i> ::P <sub>TEF1</sub> -PsCNMT, <i>ura3</i> ::P <sub>TEF1</sub> -Ps4'OMT, <i>lys2</i> ::P <sub>TEF1</sub> -PsBBE-loxP-KanMX-loxP                                                                                                                                                                                                                        | This work                  |
| CSY844 | <i>his3</i> ::P <sub>TEF1</sub> -Ps6OMT, <i>leu2</i> ::P <sub>TEF1</sub> -PsCNMT, <i>ura3</i> ::P <sub>TEF1</sub> -Ps4'OMT <i>trp1</i> ::P <sub>TEF1</sub> -ATR1, <i>lys2</i> ::P <sub>TEF1</sub> -PsBBE                                                                                                                                                                                                  | This work                  |
| CSY985 | <i>his3</i> ::P <sub>TEF1</sub> -Ps6OMT, <i>leu2</i> ::P <sub>TEF1</sub> -PsCNMT, <i>ura3</i> ::P <sub>TEF1</sub> -Ps4'OMT <i>trp1</i> ::P <sub>TEF1</sub> -PsCPR-loxP-LEU2-loxP, <i>lys2</i> ::P <sub>TEF1</sub> -PsBBE-loxP-KanMX-loxP                                                                                                                                                                  | This work                  |
| CSY850 | <i>his3</i> ::P <sub>TEF1</sub> -Ps6OMT, <i>leu2</i> ::P <sub>TEF1</sub> -PsCNMT, <i>ura3</i> ::P <sub>TEF1</sub> -Ps4'OMT <i>trp1</i> ::P <sub>TEF1</sub> -EcCPR, <i>lys2</i> ::P <sub>TEF1</sub> -PsBBE-loxP-KanMX-loxP                                                                                                                                                                                 | This work                  |
| CSY903 | <i>his3</i> ::P <sub>TEF1</sub> -Ps6OMT, <i>leu2</i> ::P <sub>TEF1</sub> -PsCNMT, <i>ura3</i> ::P <sub>TEF1</sub> -Ps4'OMT, <i>trp1</i> ::P <sub>TEF1</sub> -ATR1, <i>lys2</i> ::P <sub>TEF1</sub> -PsBBE, <i>met15</i> ::P <sub>GPD</sub> -EcCFS                                                                                                                                                         | This work                  |
| CSY904 | <i>his3</i> ::P <sub>TEF1</sub> -Ps6OMT, <i>leu2</i> ::P <sub>TEF1</sub> -PsCNMT, <i>ura3</i> ::P <sub>TEF1</sub> -Ps4'OMT, <i>trp1</i> ::P <sub>TEF1</sub> -ATR1, <i>lys2</i> ::P <sub>TEF1</sub> -PsBBE, <i>met15</i> ::P <sub>GPD</sub> -EcCFS-loxP-KanMX-loxP, <i>cin5</i> ::P <sub>GPD</sub> -EcSTS-loxP-LEU2-loxP                                                                                   | This work                  |
| CSY968 | <i>his3</i> ::P <sub>TEF1</sub> -Ps6OMT, <i>leu2</i> ::P <sub>TEF1</sub> -PsCNMT, <i>ura3</i> ::P <sub>TEF1</sub> -Ps4'OMT, <i>trp1</i> ::P <sub>TEF1</sub> -ATR1, <i>lys2</i> ::P <sub>TEF1</sub> -PsBBE-, <i>met15</i> ::P <sub>GPD</sub> -EcCFS-, <i>cin5</i> ::P <sub>GPD</sub> -EcSTS-, <i>XI-3</i> ::P <sub>GPD</sub> -PsTNMT-loxP-LEU2-loxP                                                        | This work                  |
| CSY969 | <i>his3</i> ::P <sub>TEF1</sub> -Ps6OMT, <i>leu2</i> ::P <sub>TEF1</sub> -PsCNMT, <i>ura3</i> ::P <sub>TEF1</sub> -Ps4'OMT, <i>trp1</i> ::P <sub>TEF1</sub> -ATR1, <i>lys2</i> ::P <sub>TEF1</sub> -PsBBE-, <i>met15</i> ::P <sub>GPD</sub> -EcCFS-, <i>cin5</i> ::P <sub>GPD</sub> -EcSTS-, <i>XI-3</i> ::P <sub>GPD</sub> -PsTNMT-loxP-LEU2-loxP, <i>XI-4</i> ::P <sub>GPD</sub> -PsMSH-loxP-KanMX-loxP | This work                  |

**Table 2** Plasmids used in this study.

| Plasmid Name        | Genotype                                                                                            | Reference              |
|---------------------|-----------------------------------------------------------------------------------------------------|------------------------|
| pAG416GPD-ccdB      | Centromeric <i>URA</i> , P <sub>GPD</sub> -ccdB recombination cassette                              | (Alberti et al., 2007) |
| pAG414GPD-ccdB      | Centromeric <i>TRP</i> , P <sub>GPD</sub> -ccdB recombination cassette                              | (Alberti et al., 2007) |
| pAG413GPD-ccdB      | Centromeric <i>HIS</i> , P <sub>GPD</sub> -ccdB recombination cassette                              | (Alberti et al., 2007) |
| pAG424GPF-ccdB      | <i>2u TRP</i> , P <sub>GPD</sub> -ccdB recombination cassette                                       | (Alberti et al., 2007) |
| pAG416GPD-ccdB-EGFP | Centromeric <i>URA</i> , P <sub>GPD</sub> -ccdB-EGFP recombination cassette, for C-terminal GFP tag | (Alberti et al., 2007) |
| pAG426GPD-ccdB-EGFP | <i>2u URA</i> , P <sub>GPD</sub> -ccdB-EGFP recombination cassette, for C-terminal GFP tag          | (Alberti et al., 2007) |
| pCS2238             | <i>pAG416</i> -P <sub>GPD</sub> - <i>EcCFS</i>                                                      | This work              |
| pCS2219             | <i>pAG416</i> -P <sub>GPD</sub> - <i>AmCFS</i>                                                      | This work              |
| pCS2237             | <i>pAG416</i> -P <sub>GPD</sub> - <i>PsCFS</i>                                                      | This work              |
| pCS2402             | <i>pAG414</i> -P <sub>GPD</sub> - <i>EcSTS</i>                                                      | This work              |
| pCS2403             | <i>pAG414</i> -P <sub>GPD</sub> - <i>PsSTS</i>                                                      | This work              |
| pCS2329             | <i>pAG414</i> -P <sub>GPD</sub> - <i>AmSTS</i>                                                      | This work              |
| pCS3044             | <i>pAG414</i> -P <sub>GPD</sub> - <i>EcCFS</i>                                                      | This work              |
| pCS3045             | <i>pAG414</i> -P <sub>GPD</sub> - <i>AmCFS</i>                                                      | This work              |
| pCS3046             | <i>pAG414</i> -P <sub>GPD</sub> - <i>PsCFS</i>                                                      | This work              |
| pCS3047             | <i>pAG424</i> -P <sub>GPD</sub> - <i>EcCFS</i>                                                      | This work              |
| pCS2438             | <i>pAG416</i> -P <sub>TEF1</sub> - <i>EcCFS</i>                                                     | This work              |
| pCS2439             | <i>pAG416</i> -P <sub>PGK1</sub> - <i>EcCFS</i>                                                     | This work              |
| pCS2440             | <i>pAG416</i> -P <sub>HXT7</sub> - <i>EcCFS</i>                                                     | This work              |
| pCS3048             | <i>pAG416</i> -P <sub>TPH1</sub> - <i>EcCFS</i>                                                     | This work              |
| pCS2230             | <i>pAG416</i> -P <sub>GPD</sub> - <i>EcCFS</i> -EGFP                                                | This work              |
| pCS2331             | <i>pAG416</i> -P <sub>GPD</sub> - <i>AmCFS</i> -EGFP                                                | This work              |
| pCS2303             | <i>pAG416</i> -P <sub>GPD</sub> - <i>PsCFS</i> -EGFP                                                | This work              |
| pCS2149             | <i>pAG426</i> -P <sub>GPD</sub> - <i>EcCFS</i> -EGFP                                                | This work              |
| pCS2221             | <i>pAG426</i> -P <sub>GPD</sub> - <i>AmCFS</i> -EGFP                                                | This work              |
| pCS2118             | <i>pAG426</i> -P <sub>GPD</sub> - <i>PsCFS</i> -EGFP                                                | This work              |
| pCS1970             | <i>2u TRP</i> , <i>DsRED-KAR2-HDEL</i>                                                              | (Thodey et al., 2014)  |
| pCS3052             | <i>pAG413</i> -P <sub>GPD</sub> -PsTNMT                                                             | This work              |
| pCS3053             | <i>pAG413</i> -P <sub>GPD</sub> -EcTNMT                                                             | This work              |
| pCS3054             | <i>pAG414</i> -P <sub>GPD</sub> -EcP6H                                                              | This work              |
| pCS3055             | <i>pAG414</i> -P <sub>GPD</sub> -PsP6H                                                              | This work              |



**Table 3** Integration Primers used in this study.

| Primer Name      | Sequence                                                                                                                                       |
|------------------|------------------------------------------------------------------------------------------------------------------------------------------------|
| <b>LYS2.fwd</b>  | 5' -<br>CAGAGAGAACCTGTGTTGTGGAGACTCCAACACTAAATTCCGACAAGTCCCCTTCTTTCACCTATCGCGACATCAAC<br>CGCAGATTGTA CTGAGAGTGCAC-3'                           |
| <b>LYS2.rev</b>  | 5' -<br>GTAAGTAATTGACCCATGGCAGGTGTTAAATGGGTA ACTGTGCAACCATACTTACTCATCCATTCCGCTAAACGGCC<br>CGGCGACTCACTATAGGGAGACC-3'                           |
| <b>MET15.fwd</b> | 5' -<br>GCTCACAGATCCAGAGCTGTACCAATTTACGCCACCCTTCTTATGTTTTCGAAAACCTAAGCATGGTTCGCAATT<br>GTTAGATTGTA CTGAGAGTGCAC-3'                             |
| <b>MET15.rev</b> | 5' -<br>GACACCACCGAAACCGTTAGATAGATACTTCTTAGCATTTTTCATGATGAGAATGAGATGCTAAACCAGGGTATGAAA<br>CCCCGACTCACTATAGGGAGACC-3'                           |
| <b>CIN5.fwd</b>  | 5' -<br>GAATAACAGCTTGAACAAGAAGGAAAACCAAAAACCTACTCAAATGTTAATGCAAATAAAAATGGACAATCATCCT<br>TTTAATTTTCAACCTATTTTAGCTTCAGATTGTA CTGAGAGTGCAC-3'     |
| <b>CIN5.rev</b>  | 5' -<br>GCCATGTGCTTTGAAAAC TTTTAAGATGTACTAGTACTAATAATTATTCATTATTTTATTCTTTTAATTTTCGACTT<br>TAATGATTCAATCATTTTTTTCAATTCACCGACTCACTATAGGGAGACC-3' |
| <b>XI-3.fwd*</b> | 5' -<br>CCAATCAAAGAAGCATCGGTT CAGATCGAGCAAAC TGTAGGGAGAAAGGAAAGTAGAAATGCAGAGTGTGCTATATG<br>TCCAGATTGTA CTGAGAGTGCAC-3'                         |
| <b>XI-3.rev*</b> | 5' -<br>GCAGGAGCCAATAGTAGTCGGAAAGATGAGTGTATAGATTTTTTCGTATTTTTATTTTCGAGTAAAAATATCACGCTCTT<br>AGGCGACTCACTATAGGGAGACC-3'                         |
| <b>XI-4.fwd*</b> | 5' -<br>CCTTCTATACCAAGTAATGAATGTCTTGAGGGCCCGTATGGCCGCGGAAGGCTTAGTTAAGATGTTTCAGCAAAC<br>GGCAGATTGTA CTGAGAGTGCAC-3'                             |
| <b>XI-4.rev*</b> | 5' -<br>GTAATGTAAGTGATAACAAGTATGAAAAGGCCCAATGTACTTTTTTATATTTTTCCCTTGGTCTTTTTCCCTTATCA<br>ATCCGACTCACTATAGGGAGACC-3'                            |

\*Integration loci were adapted from (Mikkelsen et al., 2012).

## References

- Alberti, S., Gitler, A.D., Lindquist, S., 2007. A suite of Gateway  $\square$  cloning vectors for high-throughput genetic analysis in *Saccharomyces cerevisiae* 913–919. doi:10.1002/yea
- Hagel, J.M., Beaudoin, G. a W., Fossati, E., Ekins, A., Martin, V.J.J., Facchini, P.J., 2012. Characterization of a flavoprotein oxidase from opium poppy catalyzing the final steps in sanguinarine and papaverine biosynthesis. *J. Biol. Chem.* 287, 42972–83. doi:10.1074/jbc.M112.420414
- Hawkins, K., Smolke, C., 2008. Production of benzyloquinoline alkaloids in *Saccharomyces cerevisiae*. *Nat. Chem. Biol.* 4, 564–573. doi:10.1038/nchembio.105
- Mikkelsen, M.D., Buron, L.D., Salomonsen, B., Olsen, C.E., Hansen, B.G., Mortensen, U.H., Halkier, B.A., 2012. Microbial production of indolylglucosinolate through engineering of a multi-gene pathway in a versatile yeast expression platform. *Metab. Eng.* 14, 104–11. doi:10.1016/j.ymben.2012.01.006
- Schmidt, J., Raith, K., 2005. Analysis of benzyloquinoline-type alkaloids by electrospray tandem mass spectrometry and atmospheric pressure photoionization. *Eur. J. Mass Spectrom.* 11, 325–333.
- Thodey, K., Galanie, S., Smolke, C.D., 2014. A microbial biomanufacturing platform for natural and semisynthetic opioids. *Nat. Chem. Biol.* 10, 837–44. doi:10.1038/nchembio.1613
